# Supplementary material for: Matrix effects on the magnetic properties of a molecular spin triangle embedded in a polymeric film
Source: Royal Society of Chemistry journal article supplement (doi:10.1039/d3cp05845j), 2024-01-01
Supplement: d3cp05845j1.pdf [file d3cp05845j1.pdf]

## SUPPLEMENTARY INFORMATION

### Matrix effects on the magnetic properties of a molecular spin triangle embedded in a polymeric film

Lorenzo Tesi,<sup>a\*</sup> Athanassios K. Boudalis,<sup>b\*</sup> Katja Drerup<sup>a</sup>, Mario Ruben<sup>c,d</sup> and Joris van Slageren<sup>a\*</sup>

a) Institute of Physical Chemistry and Center for Integrated Quantum Science and Technology, University of Stuttgart, Pfaffenwaldring 55, 70569 Stuttgart, Germany. Email: [lorenzo.tesi@ipc.uni-stuttgart.de](mailto:lorenzo.tesi@ipc.uni-stuttgart.de)

b) Institut de Chimie de Strasbourg (UMR 7177, CNRS-Unistra), Université de Strasbourg, 4 rue Blaise Pascal, CS 90032, F-67081 Strasbourg, France. Email: [bountalis@unistra.fr](mailto:bountalis@unistra.fr)

c) Centre Européen de Sciences Quantiques (CESQ) within the Institut de Science et d'Ingénierie Supramoléculaires (ISIS), 8 allée Gaspard Monge, BP 70028, 67083, Strasbourg Cedex, France;

d) Institute of Nanotechnology (INT), and Institute for Quantum Materials and Technology (IQMT), Karlsruhe Institute of Technology (KIT), Hermann-von-Helmholtz-Platz 1, D-76344, Eggenstein-Leopoldshafen, Germany.

### Sample preparation and characterization

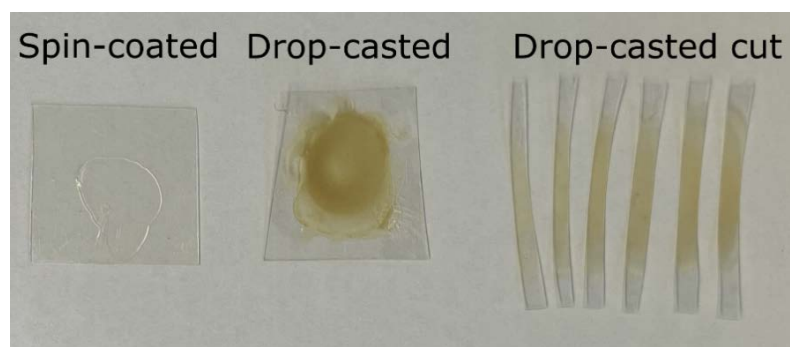

Figure S1. Examples of thin films produced by the different deposition methods: spin-coating and drop-casting. Both types of samples are deposited on a flexible substrate that can be easily cut into strips to fit the EPR tube.

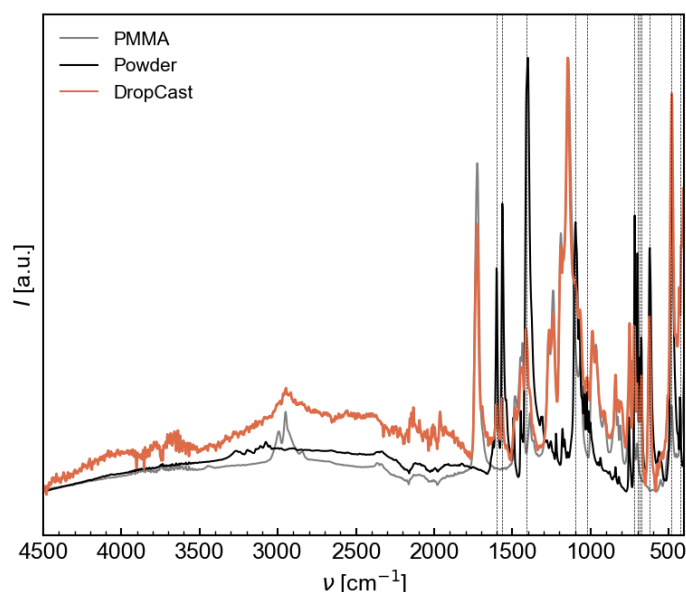

Figure S2. Fourier Transformed Infrared spectra for the pristine PMMA film,  $\text{Fe}_3$  powder and drop-casted  $\text{Fe}_3(10\%)$  sample in the full experimental spectral range.

### Assignment of the $g \sim 1.97$ component

Preliminary attempts to include the  $g \sim 1.97$  component in the  $g_{\perp}$  distribution intrinsic to  $\text{Fe}_3$  were unsuccessful. Considering its  $g$ -value, it was then hypothesized to be related to a monomeric  $\text{Cr}^{\text{III}}$  impurity. The possibility for it to be the  $\text{Cr}^{\text{III}}$  analogue of  $\text{Fe}_3$  was discarded, first considering the FTIR data, which evidenced the complete absence of absorption peaks at  $650 \text{ cm}^{-1}$  assigned to the  $\nu_{\text{as}}[\text{Cr}_3\text{O}]$  asymmetric stretch,<sup>[1]</sup> and second, considering complete absence of magnetic resonances at  $g \sim 1.769$ , typical of the  $\text{Cr}_3$  complex.<sup>[2]</sup> To assess the abundance of this component in the sample, it was simulated by a paramagnetic  $S = 3/2$  species. Simulations revealed that this component (best-fit parameters:  $g_z = 1.980$ ,  $g_y = 1.972$ ,  $g_x = 1.964$ ,  $D = 0$ ,  $\sigma = 9.68 \text{ mT}_{\text{pp}}$ ) corresponds roughly to 1% of the total spectral intensity, though this cannot be directly correlated to its actual fraction in the sample. Since the absolute value of the spectral intensity also depends on the spin-lattice relaxation rate,  $T_1^{-1}$ , which is much faster for exchange-coupled systems than for monomeric species, this value can only be considered as the ceiling of the minor component fraction, which is therefore expected to be significantly lower. If we also take into account the nuclearity of the  $\text{Fe}_3$  complex, the minor component should be less than 0.3% of the total metal content. In conclusion, we assign this component to a minor  $\text{Cr}^{\text{III}}$  presence from the starting material.

### Estimation of dipolar interactions

The probability  $P(r)$  for an interparticle distance  $r$  (in  $\text{\AA}$ ) was calculated by the relation  $P(r) = 4\pi r^2 N_A c e^{-4\pi r^3 N_A c/3}$  where  $c$  is the concentration (in M), and  $N_A$  Avogadro's number.<sup>[3,4]</sup> For  $c = 0.0063 \text{ M}$ , the interparticle distance distribution shown in Figure S3, has a mode of  $\sim 34.5 \text{ \AA}$ .

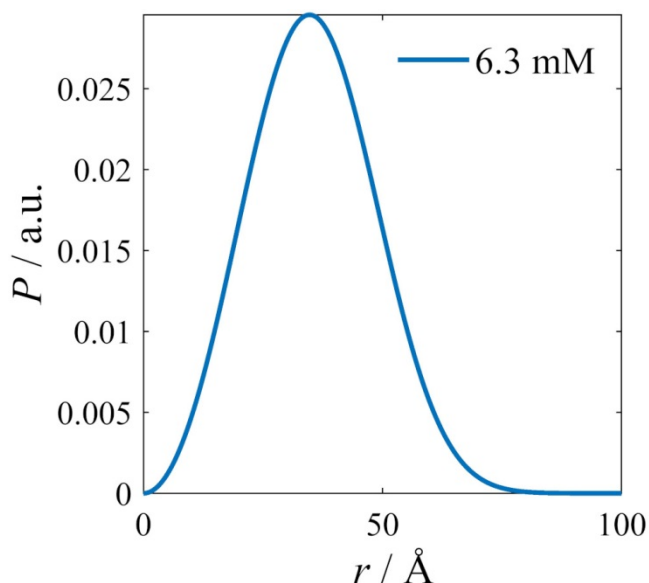

Figure S3. Distribution of interspin distances in the 10% PMMA film, assuming Poisson statistics. The mode of the distribution is 34.5 Å.

At these distances, dipolar couplings are too weak to cause a significant effect in line positions of CW EPR spectra (hence the need of pulse techniques to probe such distances). However, they do decrease the phase memory time,  $T_M$  through concentration-dependent mechanisms, leading to line broadening (see: Schweiger, Jeschke, *Principles of pulse electron paramagnetic resonance*, pp. 214-217). Actually, even in the powder sample, the closest intermolecular distances (12.25 Å) are at the limit of what can be detected by CW techniques. Hence, at these concentrations, we assign the spectral changes in the  $g_{\perp}$  region to direct interactions with the polymer matrix.

## References

- [1] Sowrey, F. E.; Tilford, C.; Wocadlo, S.; Anson, C. E.; Powell, A. K.; Bennington, S. M.; Montfrooij, W.; Jayasooriya, U. A.; Cannon, R. D. Spin Frustration and Concealed Asymmetry: Structure and Magnetic Spectrum of  $[\text{Fe}_3\text{O}(\text{O}_2\text{CPh})_6(\text{Py})_3]\text{ClO}_4 \cdot \text{py}$ . *J. Chem. Soc. Dalton Trans.* **2001**, 6, 862. doi.org/10.1039/b008121n
- [2] Boudalis, A. K.; Rogez, G.; Turek, P. Determination of the Distributions of the Spin-Hamiltonian Parameters in Spin Triangles: A Combined Magnetic Susceptometry and Electron Paramagnetic Resonance Spectroscopic Study of the Highly Symmetric  $[\text{Cr}_3\text{O}(\text{PhCOO})_6(\text{Py})_3](\text{ClO}_4) \cdot 0.5\text{py}$ . *Inorg. Chem.* **2018**, 57, 13259. doi.org/10.1021/acs.inorgchem.8b01764
- [3] Chandrasekhar, S. Stochastic Problems in Physics and Astronomy. *Rev. Mod. Phys.* **1943**, 15, 1. doi.org/10.1103/RevModPhys.15.1
- [4] Sienicki, K. *Molecular Electronics and Molecular Electronic Devices*, **1993**, CRC Press, Inc., Boca Raton, Florida, pp. 216-218.
